# Supplementary material
Source: MDPI journal article supplement (https://www.mdpi.com/2073-4441/12/5/1453)
Supplement: s1 [file s1]

**Table S1.** Spring and Autumn 2018 Load selected antibiotics in mg/day/1000 inhabitants.

| #WWTP | Spring 2019                                                         |                                                                     | Autumn 2019                                                         |                                                                     |
|-------|---------------------------------------------------------------------|---------------------------------------------------------------------|---------------------------------------------------------------------|---------------------------------------------------------------------|
|       | Influent Antibiotic<br>Mass Loading<br>(mg/day/1000<br>Inhabitants) | Effluent Antibiotic<br>Mass Loading<br>(mg/day/1000<br>Inhabitants) | Influent Antibiotic<br>Mass Loading<br>(mg/day/1000<br>Inhabitants) | Influent Antibiotic<br>Mass Loading<br>(mg/day/1000<br>Inhabitants) |
| WWTP1 | ENR = 279.8                                                         | ENR = 123.3                                                         | ENR = 109.1                                                         | ENR = N/D                                                           |
|       | SDZ = N/D                                                           | SDZ = N/D                                                           | SDZ = 39.8                                                          | SDZ = N/D                                                           |
|       | AMX = N/D                                                           | AMX = N/D                                                           | AMX = N/D                                                           | AMX = N/D                                                           |
|       | AZI = 497.8                                                         | AZI = 426.6                                                         | AZI = 1977.2                                                        | AZI = 804.9                                                         |
|       | TMP = 61.63                                                         | TMP = N/D                                                           | TMP = 80.1                                                          | TMP = 20.9                                                          |
| WWTP2 | ENR = 159.2                                                         | ENR = 153.5                                                         | ENR = 176.2                                                         | ENR = N/D                                                           |
|       | SDZ = 38.7                                                          | SDZ = 34.1                                                          | SDZ = 30.7                                                          | SDZ = N/D                                                           |
|       | AMX = N/D                                                           | AMX = N/D                                                           | AMX = N/D                                                           | AMX = N/D                                                           |
|       | AZI = 431.9                                                         | AZI = 250.1                                                         | AZI = 1019.1                                                        | AZI = 400.7                                                         |
|       | TMP = 51.2                                                          | TMP = 34.1                                                          | TMP = 29.6                                                          | TMP = 27.9                                                          |
| WWTP3 | ENR = 1166.7                                                        | ENR = 399.15                                                        | ENR = 798.3                                                         | ENR = 614.1                                                         |
|       | SDZ = N/D                                                           | SDZ = N/D                                                           | SDZ = N/D                                                           | SDZ = N/D                                                           |
|       | AMX = N/D                                                           | AMX = N/D                                                           | AMX = N/D                                                           | AMX = N/D                                                           |
|       | AZI = 829.0                                                         | AZI = 645.1                                                         | AZI = 2072.5                                                        | AZI = 1277.0                                                        |
|       | TMP = N/D                                                           | TMP = N/D                                                           | TMP = N/D                                                           | TMP = N/D                                                           |
| WWTP4 | ENR = 155.2                                                         | ENR = N/D                                                           | ENR = 133.8                                                         | ENR = N/D                                                           |
|       | SDZ = N/D                                                           | SDZ = N/D                                                           | SDZ = N/D                                                           | SDZ = N/D                                                           |
|       | AMX = N/D                                                           | AMX = N/D                                                           | AMX = N/D                                                           | AMX = N/D                                                           |
|       | AZI = 597.3                                                         | AZI = 214.1                                                         | AZI = 1296.7                                                        | AZI = 588.7                                                         |
|       | TMP = 42.8                                                          | TMP = 21.4                                                          | TMP = 33.2                                                          | TMP = 32.7                                                          |

Table S2. Spring and Autumn 2019 Load of selected antibiotics in mg/day/1000 inhabitants.

| #WWTP | Spring 2019                                                         |                                                                     | Autumn 2019                                                         |                                                                     |
|-------|---------------------------------------------------------------------|---------------------------------------------------------------------|---------------------------------------------------------------------|---------------------------------------------------------------------|
|       | Influent Antibiotic<br>Mass Loading<br>(mg/day/1000<br>Inhabitants) | Effluent Antibiotic<br>Mass Loading<br>(mg/day/1000<br>Inhabitants) | Influent Antibiotic<br>Mass Loading<br>(mg/day/1000<br>Inhabitants) | Influent Antibiotic<br>Mass Loading<br>(mg/day/1000<br>Inhabitants) |
| WWTP1 | ENR = 4329.5                                                        | ENR = 2495.4                                                        | ENR = 331.83                                                        | ENR = N/D                                                           |
|       | SDZ = 88                                                            | SDZ = N/D                                                           | SDZ = 17.1                                                          | SDZ = 2                                                             |
|       | AMX = N/D                                                           | AMX = N/D                                                           | AMX = N/D                                                           | AMX = N/D                                                           |
|       | AZI = 10127.1                                                       | AZI = 4447                                                          | AZI = 437.5                                                         | AZI = N/D                                                           |
|       | TMP = 1401.8                                                        | TMP = N/D                                                           | TMP = 31.8                                                          | TMP = 31.8                                                          |
| WWTP2 | ENR = 2963.6                                                        | ENR = 728.1                                                         | ENR = 5.7                                                           | ENR = 3.4                                                           |
|       | SDZ = 184.2                                                         | SDZ = N/D                                                           | SDZ = N/D                                                           | SDZ = N/D                                                           |
|       | AMX = N/D                                                           | AMX = N/D                                                           | AMX = N/D                                                           | AMX = N/D                                                           |
|       | AZI = 1931.9                                                        | AZI = 1561.9                                                        | AZI = 236.5                                                         | AZI = 165.9                                                         |
|       | TMP = N/D                                                           | TMP = N/D                                                           | TMP = 28.4                                                          | TMP = 18.9                                                          |
| WWTP3 | ENR = 1989.6                                                        | ENR = N/D                                                           | ENR = N/D                                                           | ENR = N/D                                                           |
|       | SDZ = N/D                                                           | SDZ = N/D                                                           | SDZ = 15.3                                                          | SDZ = N/D                                                           |
|       | AMX = N/D                                                           | AMX = N/D                                                           | AMX = N/D                                                           | AMX = N/D                                                           |
|       | AZI = 3831.8                                                        | AZI = 3393.1                                                        | AZI = N/D                                                           | AZI = N/D                                                           |
|       | TMP = N/D                                                           | TMP = N/D                                                           | TMP = 67.5                                                          | TMP = 15.35                                                         |
| WWTP4 | ENR = N/D                                                           | ENR = N/D                                                           | ENR = N/D                                                           | ENR = N/D                                                           |
|       | SDZ = N/D                                                           | SDZ = N/D                                                           | SDZ = N/D                                                           | SDZ = N/D                                                           |
|       | AMX = N/D                                                           | AMX = N/D                                                           | AMX = N/D                                                           | AMX = N/D                                                           |
|       | AZI = 11,332.4                                                      | AZI = 4261.63                                                       | AZI = 535.2                                                         | AZI = 30.5                                                          |
|       | TMP = 891.6                                                         | TMP = 787.2                                                         | TMP = 62.6                                                          | TMP = N/D                                                           |

**Table S3.** Removal efficiencies of the different WWTPs for selected antibiotics.

| #WWTP | Spring 2018 | Autumn 2018 | Spring 2019 | Autumn 2019 |
|-------|-------------|-------------|-------------|-------------|
| WWTP1 | ENR = 56%   | ENR = 100%  | ENR = 42%   | ENR = 100%  |
|       | SDZ = N/D   | SDZ = 100%  | SDZ = 100%  | SDZ = 89%   |
|       | AMX = N/D   | AMX = N/D   | AMX = N/D   | AMX = N/D   |
|       | AZI = 14%   | AZI = 59%   | AZI = 56%   | AZI = 100%  |
|       | TMP = 100%  | TMP = 74%   | TMP = 100%  | TMP = 0%    |
| WWTP2 | ENR = 4%    | ENR = 100%  | ENR = 75%   | ENR = 40%   |
|       | SDZ = 12%   | SDZ = 100%  | SDZ = 100%  | SDZ = N/D   |
|       | AMX = N/D   | AMX = N/D   | AMX = N/D   | AMX = N/D   |
|       | AZI = 42%   | AZI = 61%   | AZI = 19%   | AZI = 30%   |
|       | TMP = 33%   | TMP = 6%    | TMP = N/D   | TMP = 40%   |
| WWTP3 | ENR = 66%   | ENR = 23%   | ENR = 100%  | ENR = N/D   |
|       | SDZ = N/D   | SDZ = N/D   | SDZ = N/D   | SDZ = 100%  |
|       | AMX = N/D   | AMX = N/D   | AMX = N/D   | AMX = N/D   |
|       | AZI = 22%   | AZI = 38%   | AZI = 11%   | AZI = N/D   |
|       | TMP = N/D   | TMP = N/D   | TMP = N/D   | TMP = 77%   |
| WWTP4 | ENR = 100%  | ENR = 100%  | ENR = N/D   | ENR = N/D   |
|       | SDZ = N/D   | SDZ = N/D   | SDZ = N/D   | SDZ = N/D   |
|       | AMX = N/D   | AMX = N/D   | AMX = N/D   | AMX = N/D   |
|       | AZI = 64%   | AZI = 55%   | AZI = 62%   | AZI = 94%   |
|       | TMP = 50%   | TMP = 2%    | TMP = 12%   | TMP = 100%  |
